# Supplementary material for: A Th17 cell-intrinsic glutathione/mitochondrial-IL-22 axis protects against intestinal inflammation
Source: PubMed Central journal article supplement (PMC10363291; doi:10.1101/2023.07.06.547932), 2023-07-07

## Supplementary Figure 1

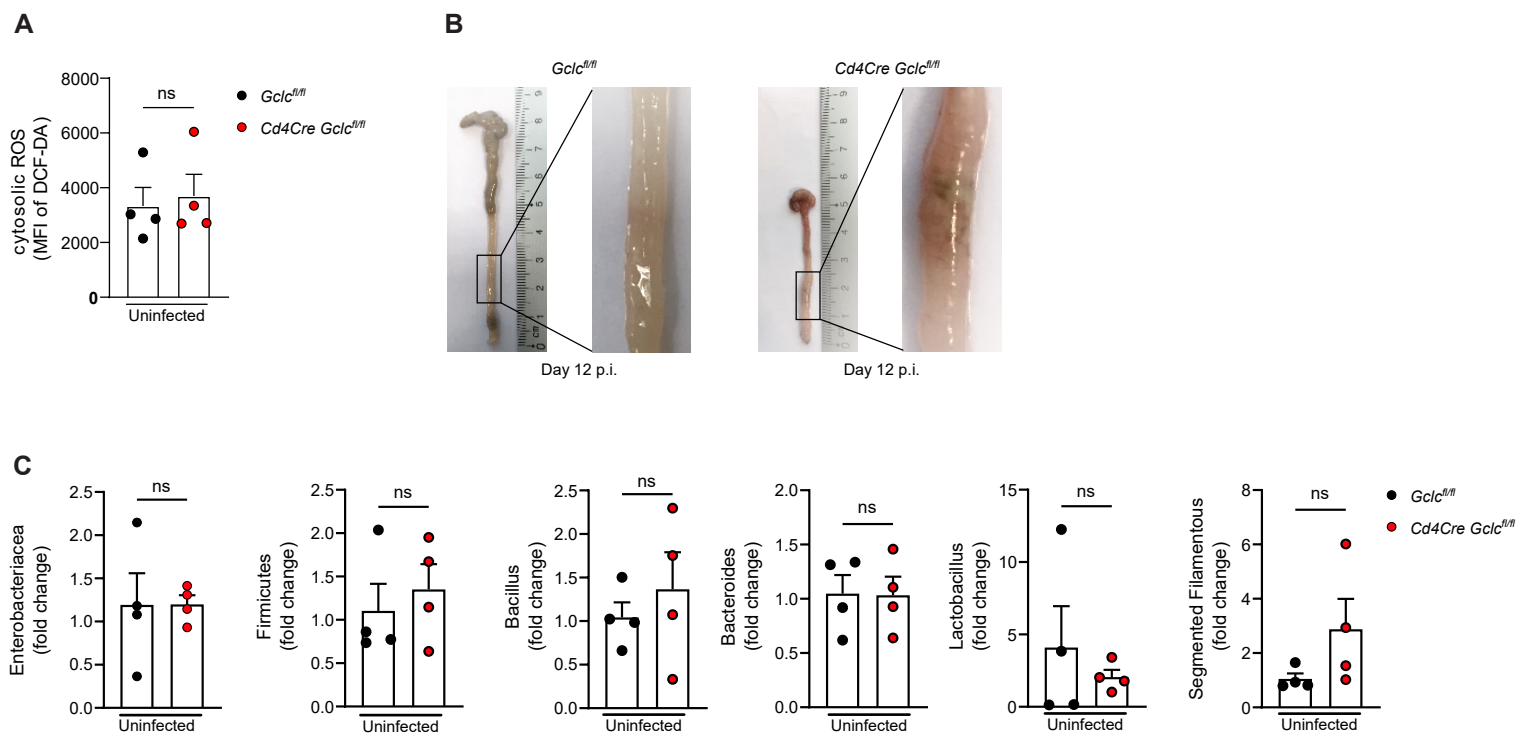

**Supplementary Figure 2**

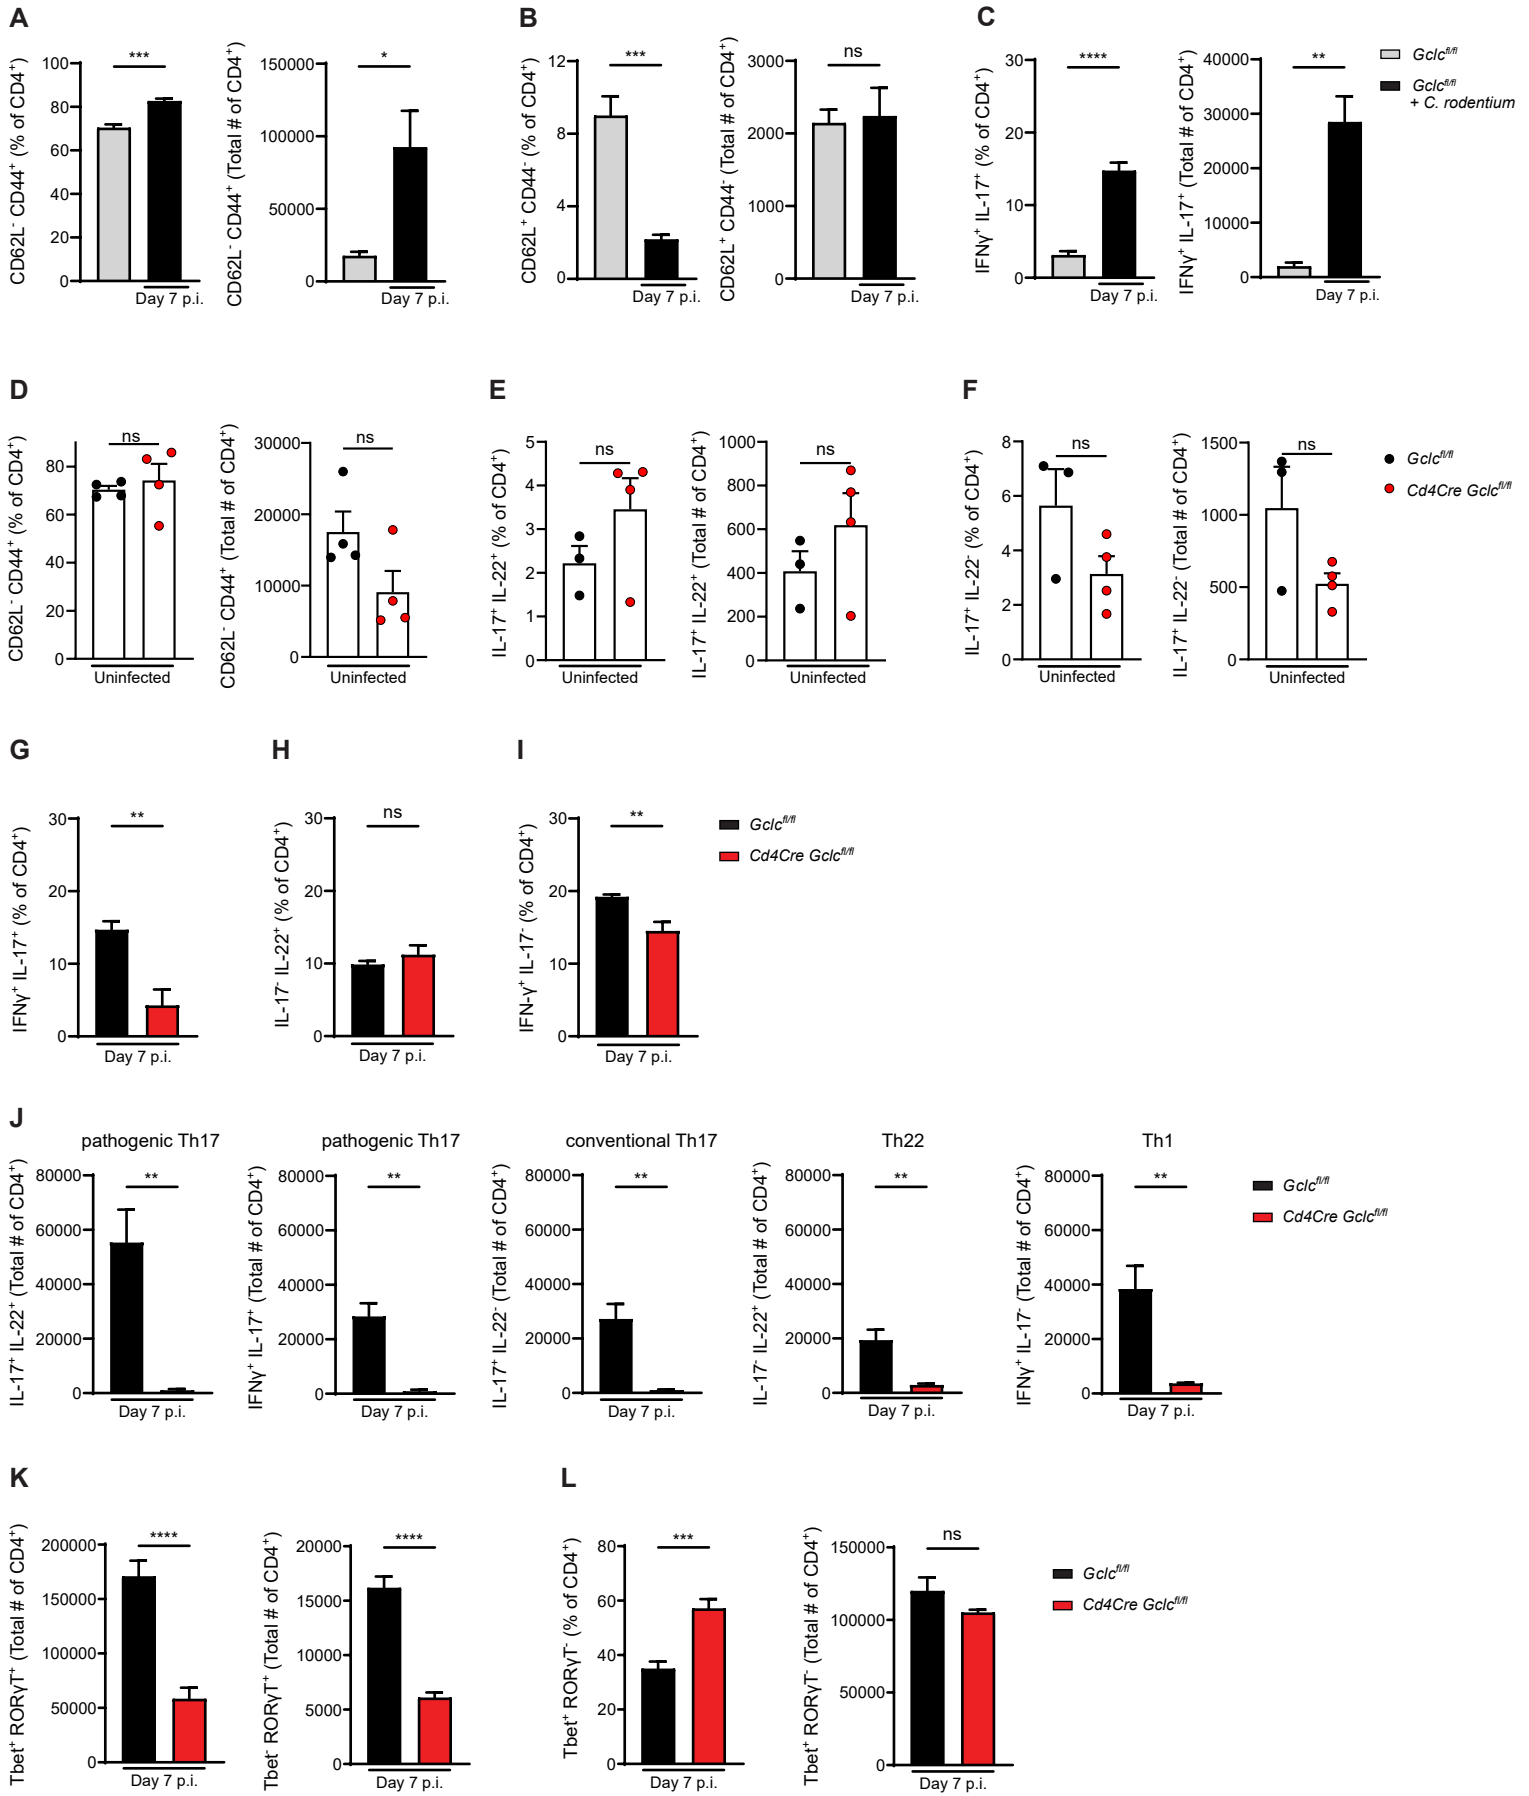

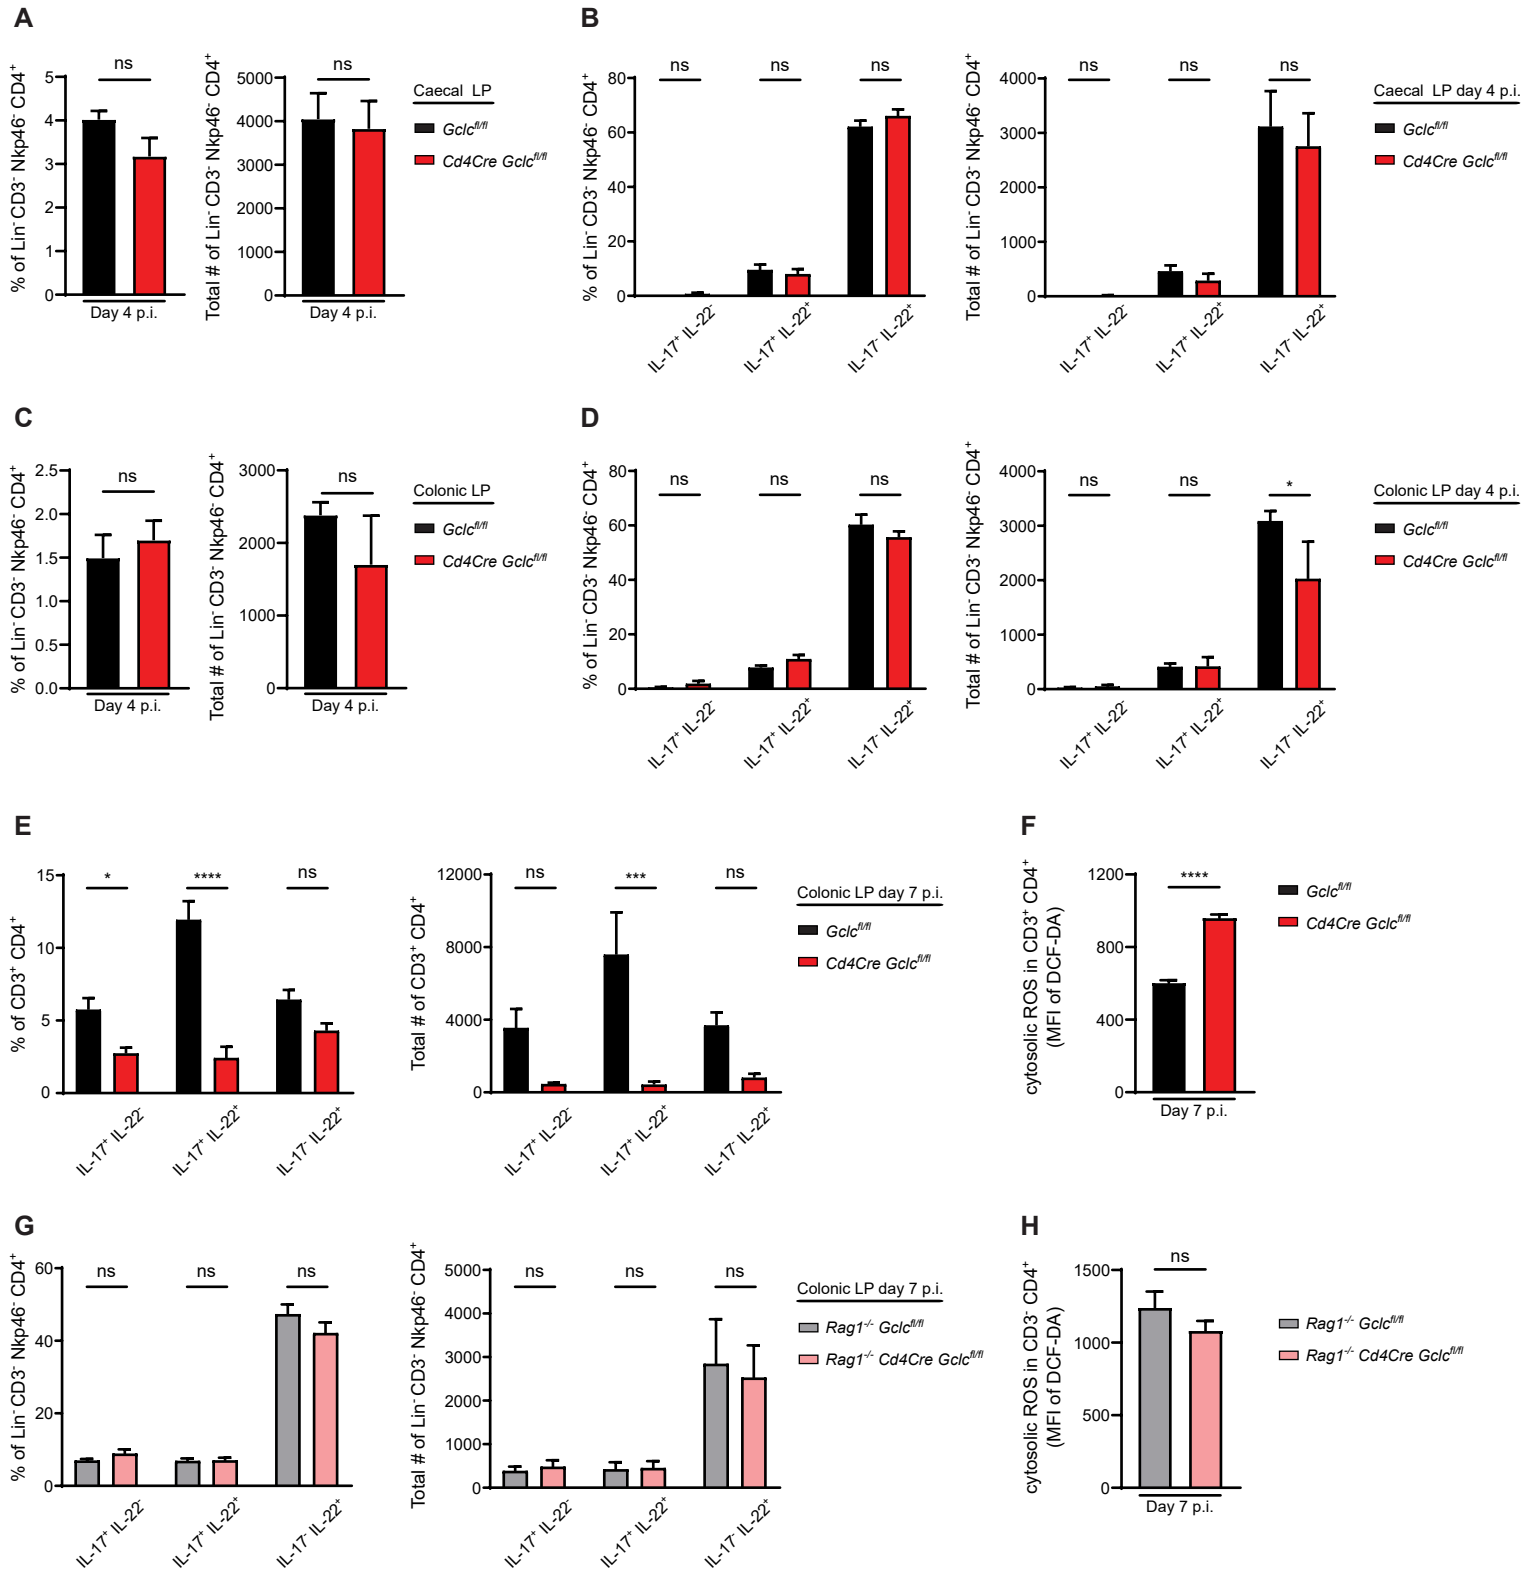



Supplementary Figure 5

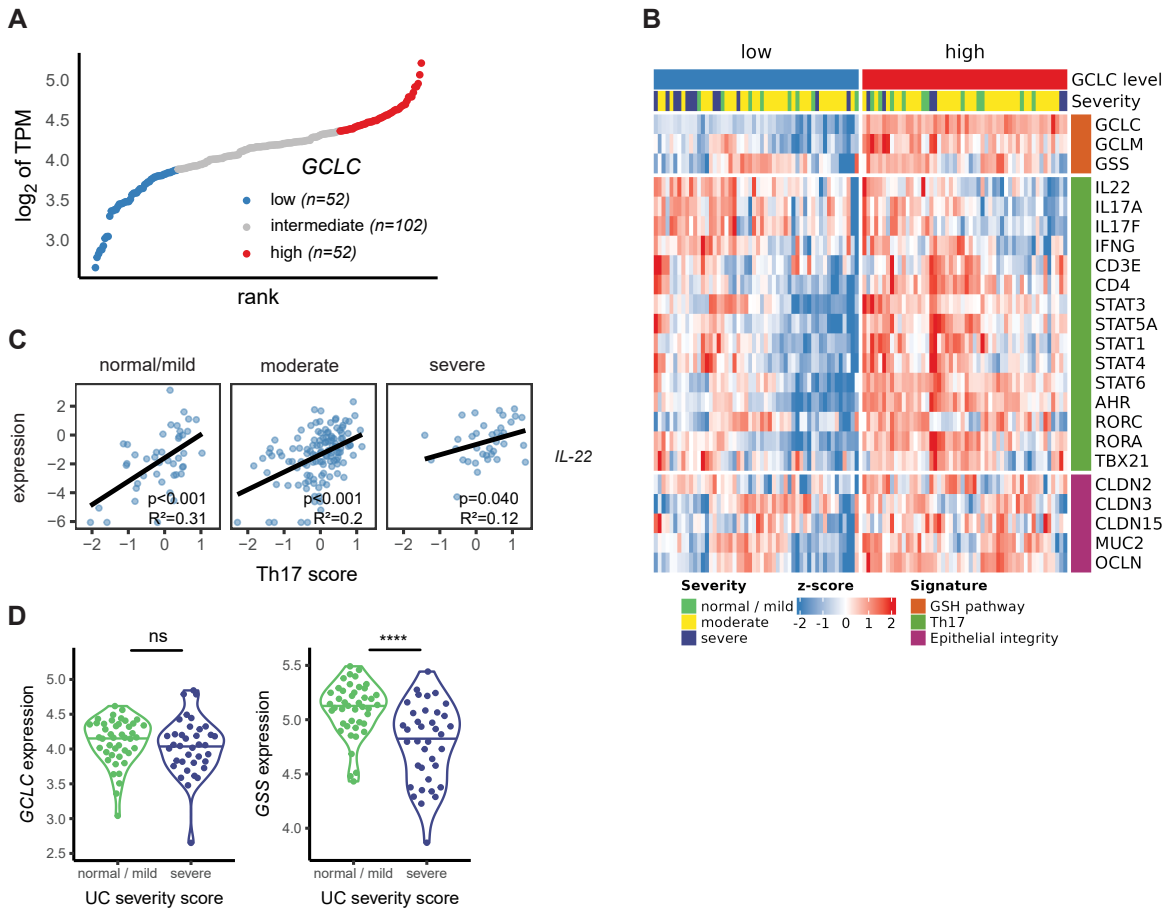

Supplementary Figure 6

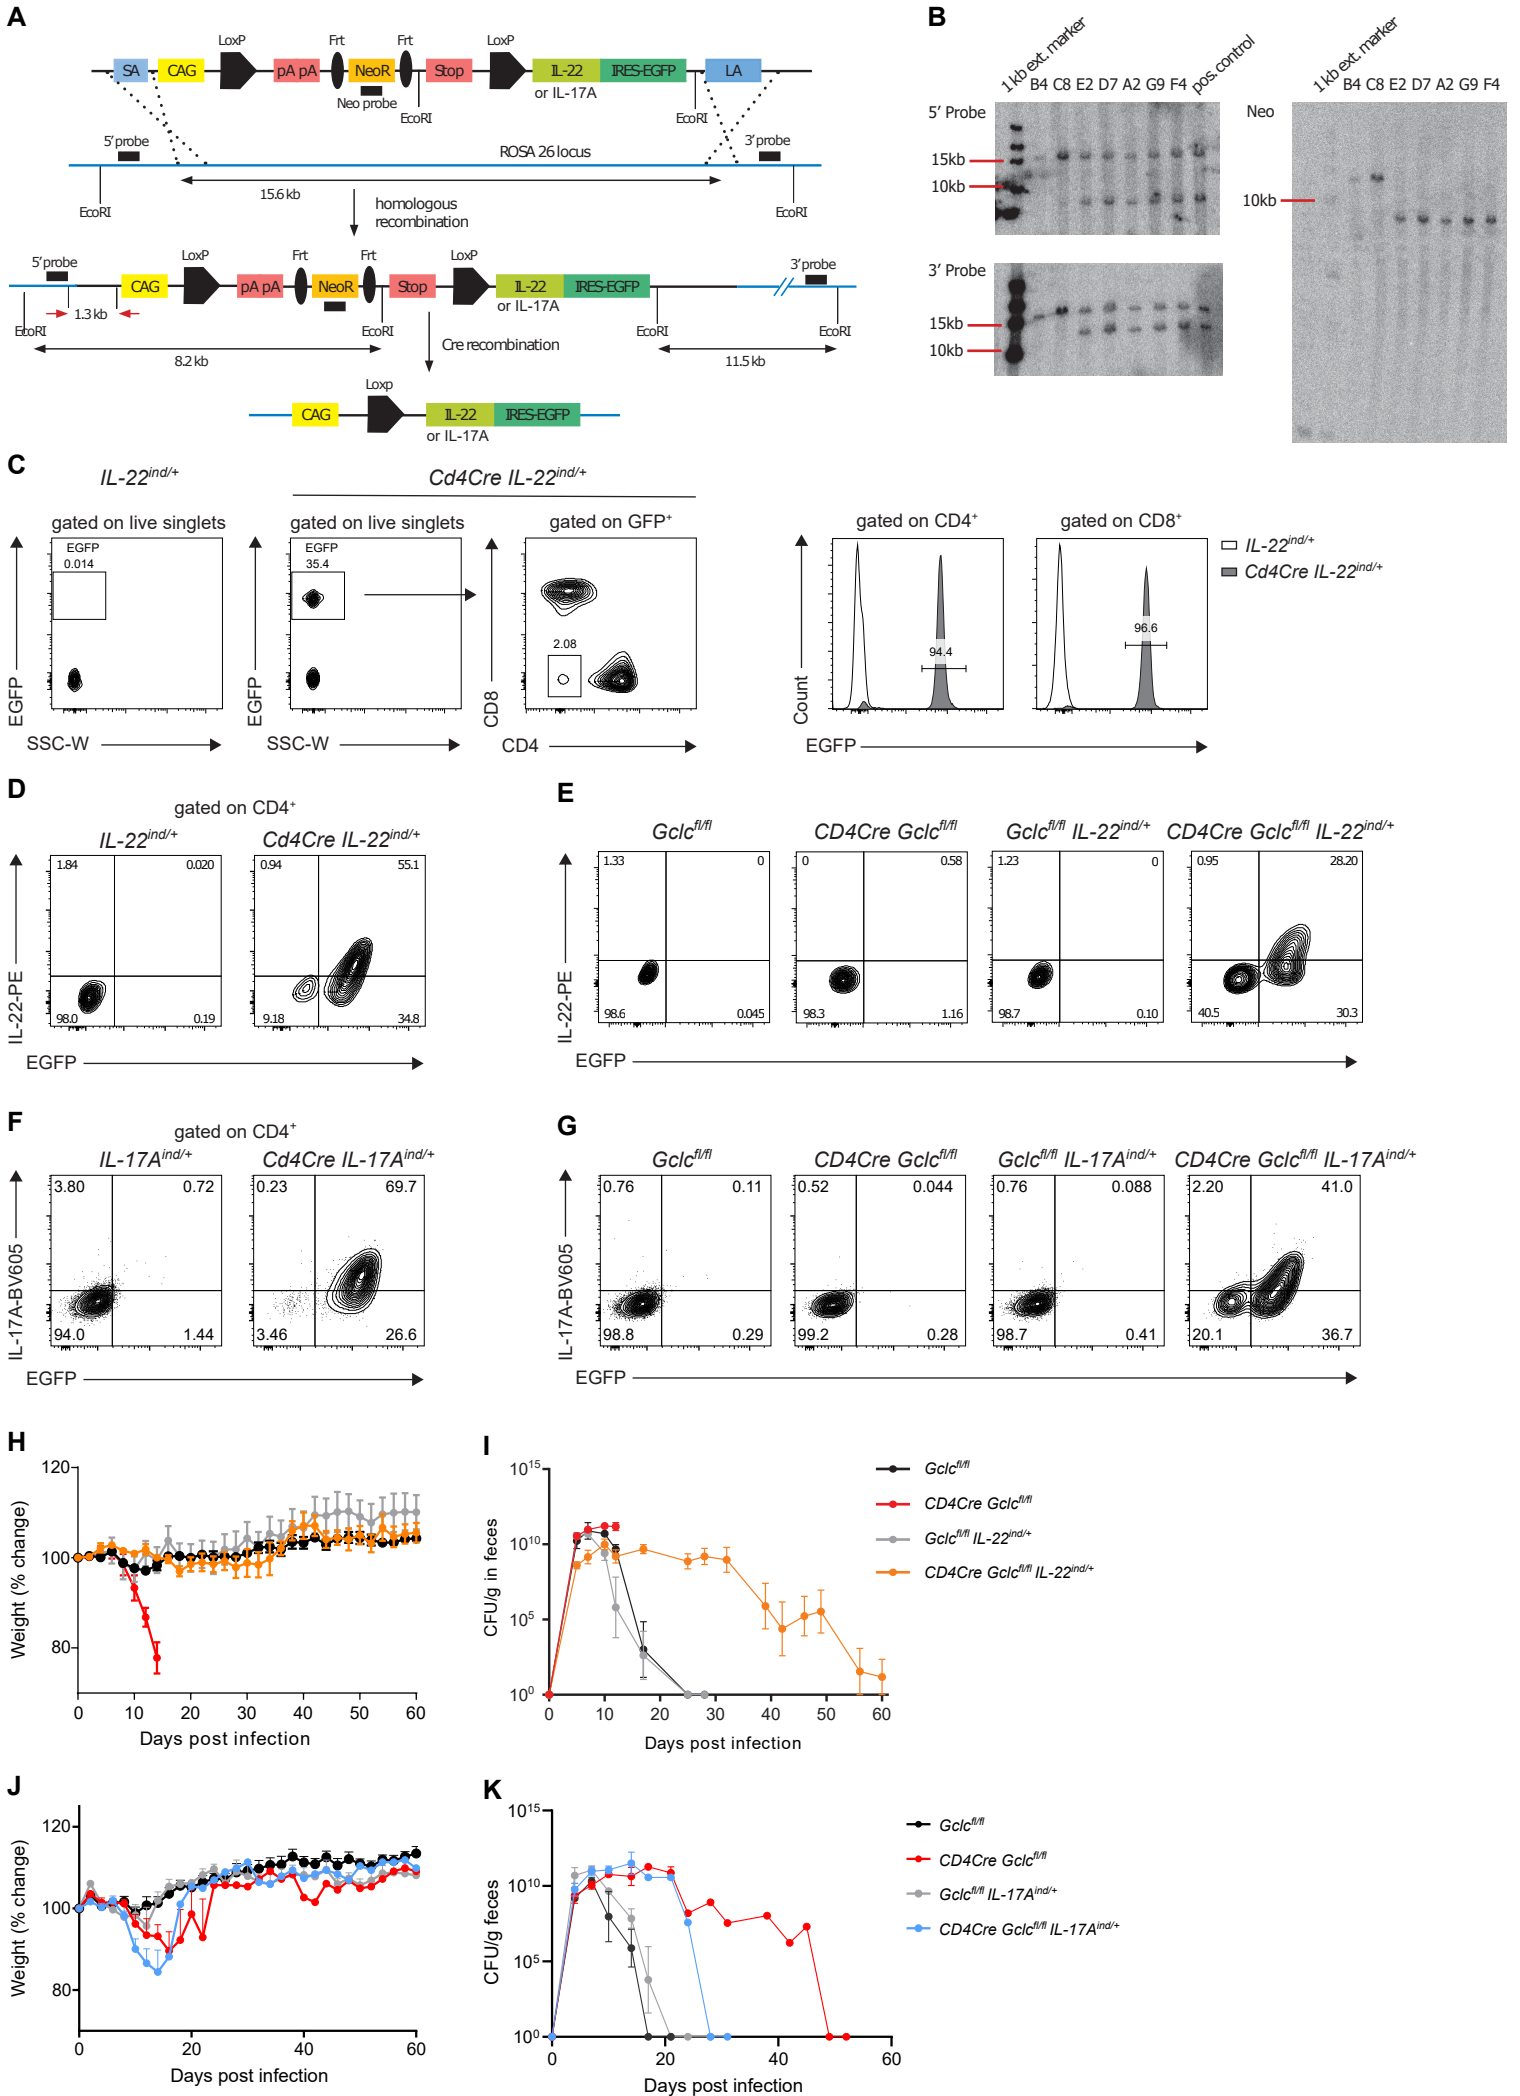

Supplementary Figure 7

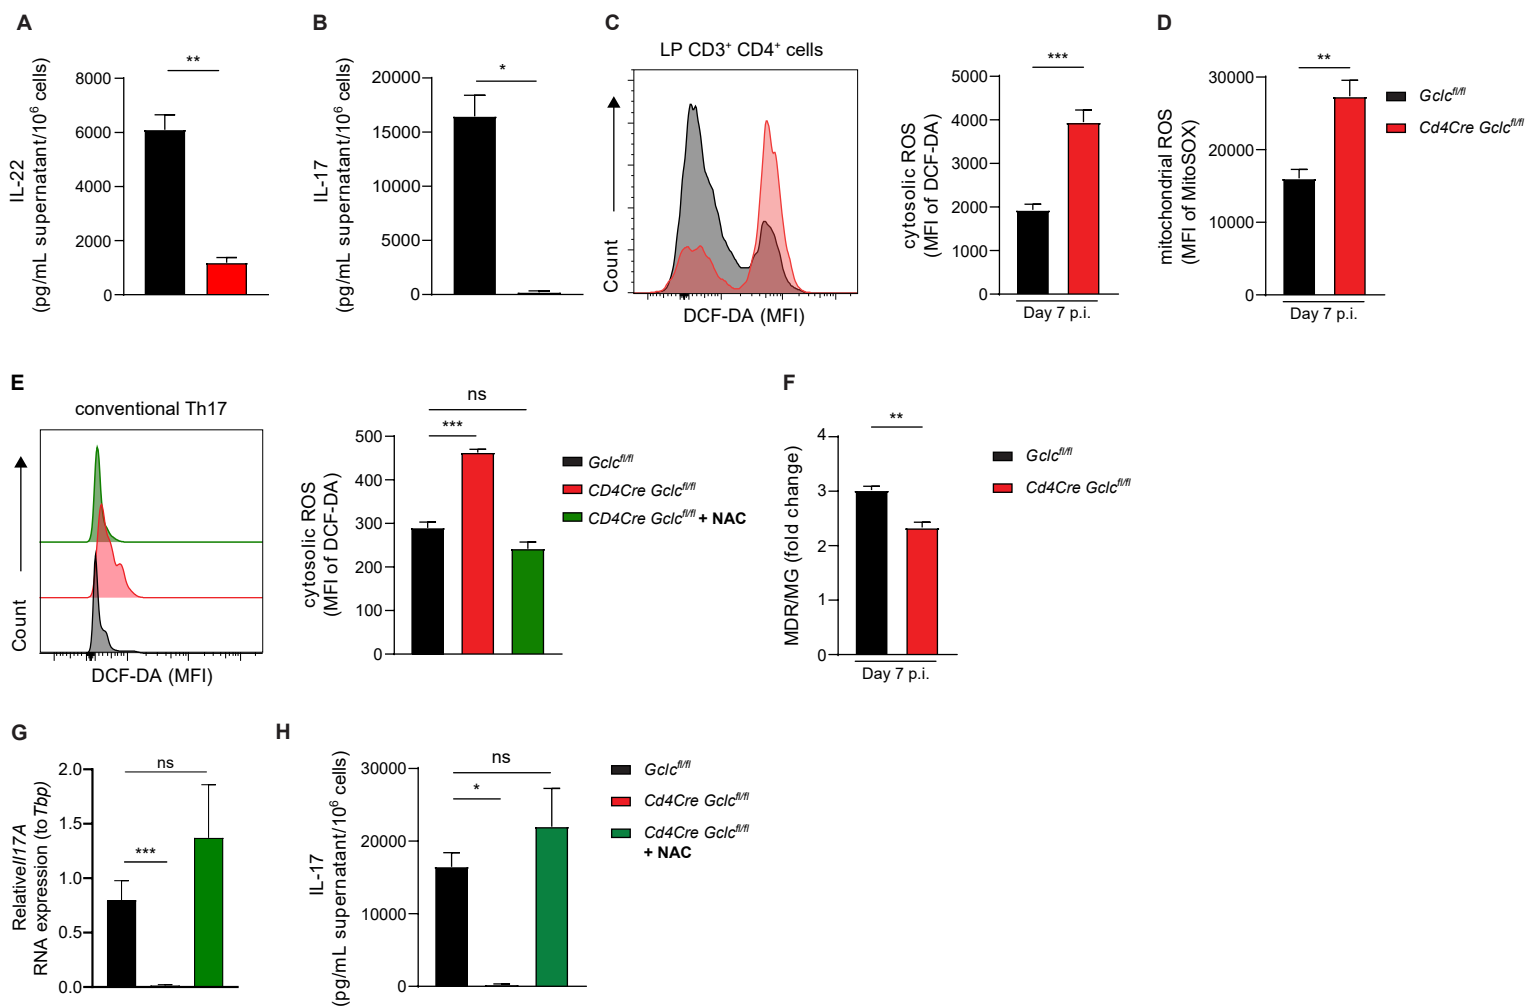

Supplement: NIHPP2023.07.06.547932v1-supplement-1.pdf [file NIHPP2023.07.06.547932v1-supplement-1.pdf]
